# Supplementary material for: A physico-chemical investigation of highly concentrated potassium acetate solutions towards applications in electrochemistry
Source: Royal Society of Chemistry journal article supplement (doi:10.1039/d0cp04151c), 2020-12-10
Supplement: d0cp04151c1.pdf [file d0cp04151c1.pdf]

## Supporting Information

### Physico-chemical investigation of highly concentrated potassium acetate solutions towards applications in electrochemistry

Pierre Stigliano<sup>a</sup>, Nicolò Pianta<sup>a</sup>, Simone Bonizzoni<sup>a</sup>, Michele Mauri<sup>a</sup>, Roberto Simonutti<sup>a</sup>, Roberto Lorenzi<sup>a</sup>,  
Barbara Vigani<sup>c</sup>, Vittorio Berbenni<sup>b</sup>, Silvia Rossi<sup>c</sup>, Piercarlo Mustarelli<sup>a</sup>, Riccardo Ruffo<sup>\*a</sup>

<sup>a</sup> Department of Materials Science, University of Milano Bicocca, via Cozzi 55, 20125 Milano, Italy

<sup>b</sup> Department of Chemistry, University of Pavia, Viale Taramelli 16, 27100 Pavia, Italy

<sup>c</sup> Department of Drug Sciences, University of Pavia, Viale Taramelli 12, 27100 Pavia, Italy

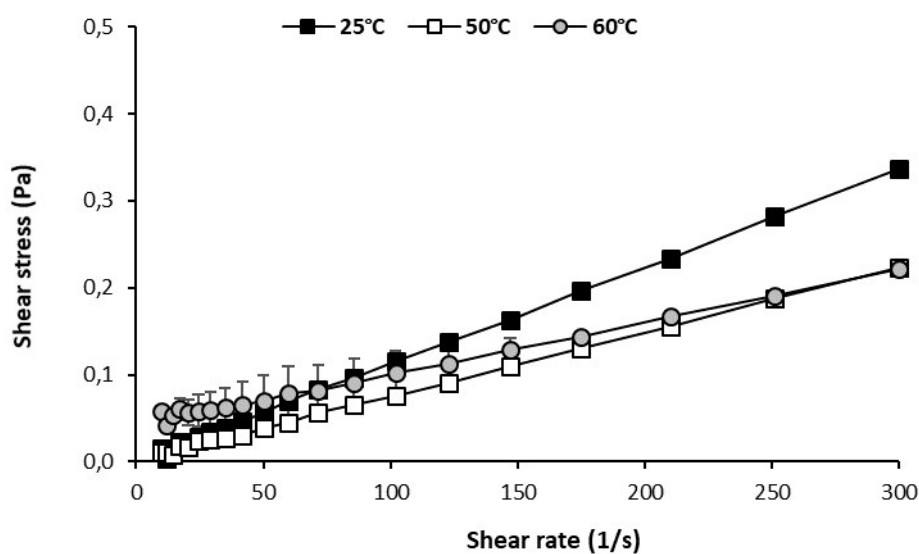

Figure S1 Flow curve of the sample KAC-1 at different temperature values (mean values  $\pm$  s.d., n=3)

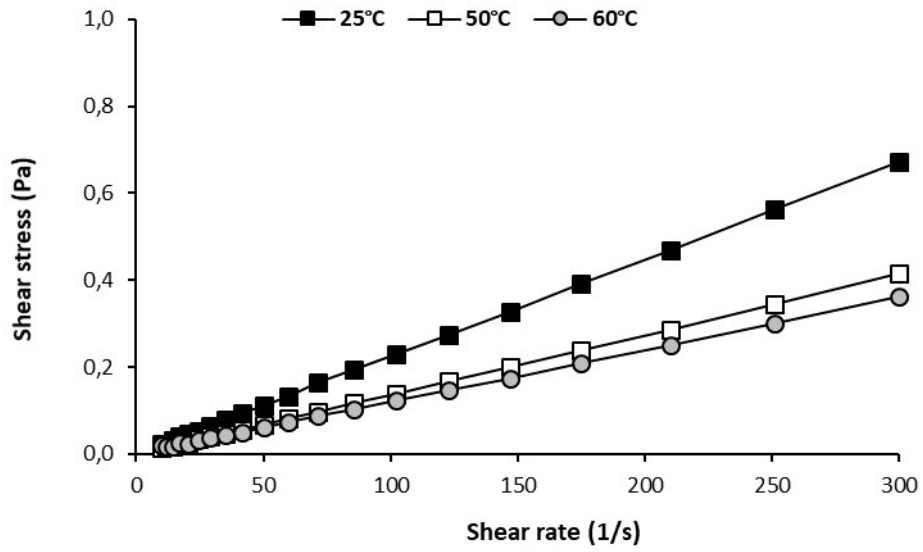

Figure S2 Flow curve of the sample KAC-5 at different temperature values (mean values  $\pm$  s.d., n=3)

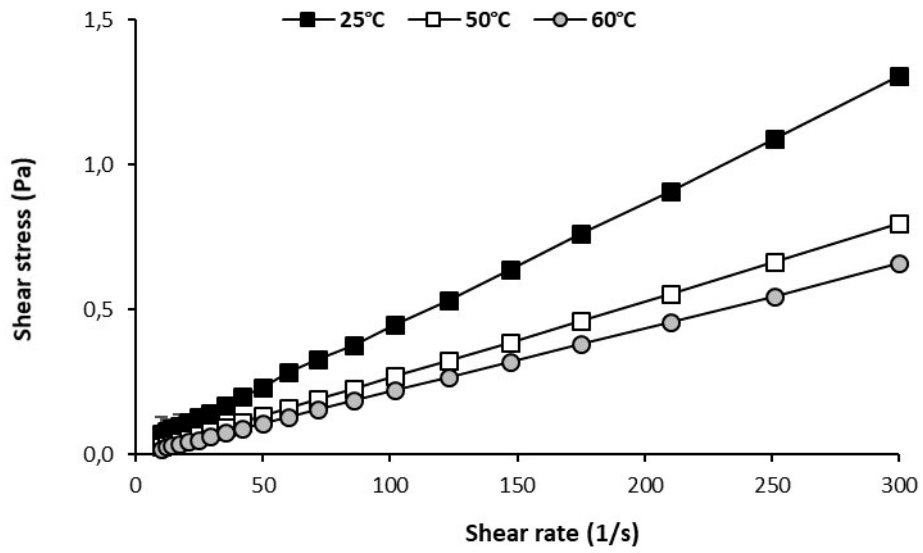

Figure S3 Flow curve of the sample KAC-10 at different temperature values (mean values  $\pm$  s.d., n=3)

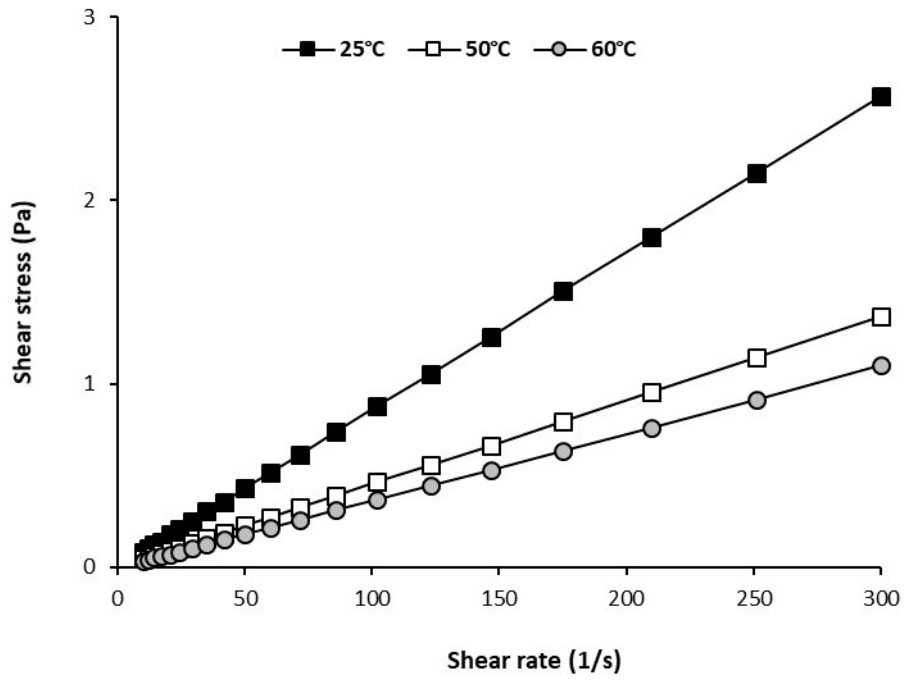

Figure S4 Flow curve of the sample KAC-15 at different temperature values (mean values  $\pm$  s.d., n=3)

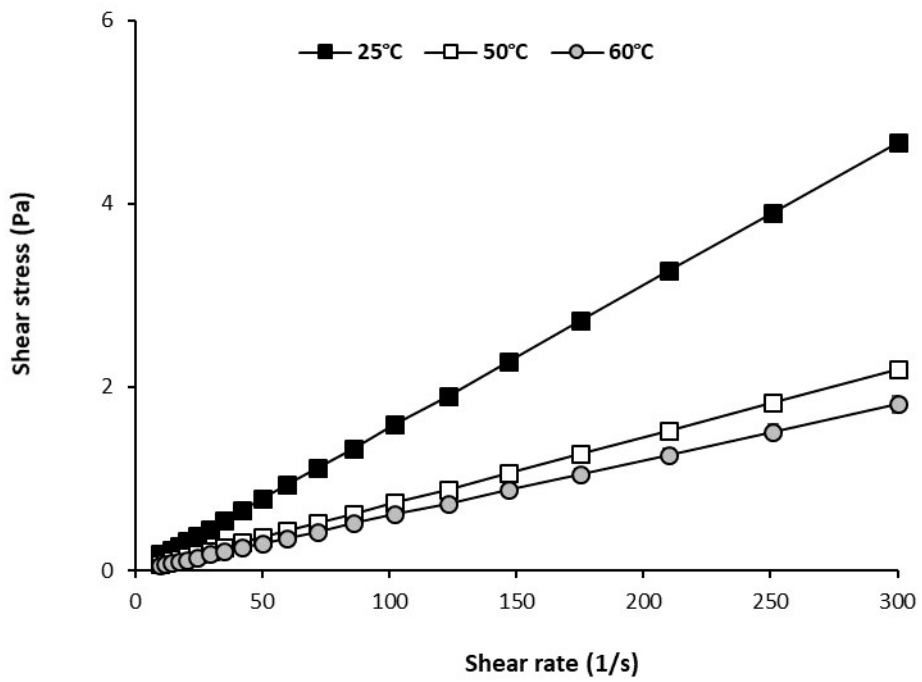

Figure S5 Flow curve of the sample KAC-20 at different temperature values (mean values  $\pm$  s.d., n=3)

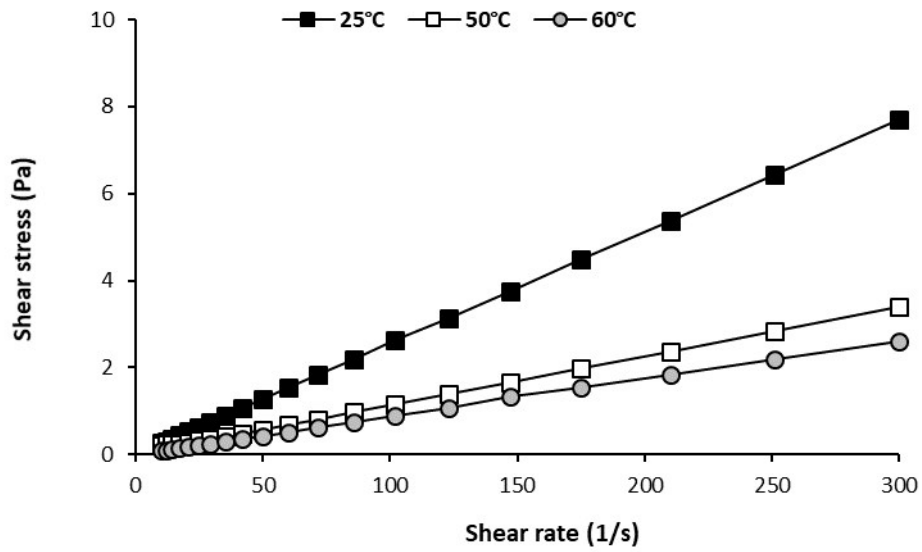

Figure S6 Flow curve of the sample KAC-25 at different temperature values (mean values  $\pm$  s.d.,  $n=3$ )

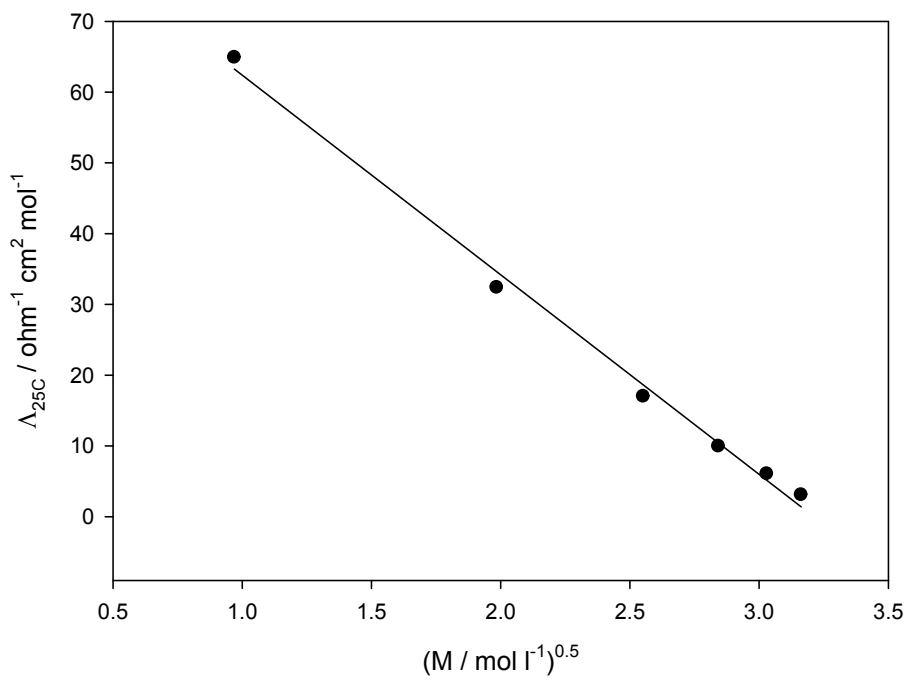

Figure S7 Molar conductivity vs. the square root of the molarity of the KAC solutions. The full line is a linear best-fit ( $R^2 > 0.99$ ). The molar conductivity at infinite dilution at 25°C is  $\Lambda_0 = 90.6 \text{ ohm}^{-1} \text{cm}^2 \text{mol}^{-1}$ .

| M<br>mol kg <sup>-1</sup> | pH   | Anodic water decomposition |      | Cathodic water decomposition |  |
|---------------------------|------|----------------------------|------|------------------------------|--|
|                           |      | V vs. SHE                  |      | V vs. SHE                    |  |
| 1                         | 6.88 | -0.39                      | 0.84 |                              |  |
| 5                         | 7.72 | -0.44                      | 0.79 |                              |  |
| 10                        | 8.57 | -0.49                      | 0.74 |                              |  |
| 15                        | 9.20 | -0.52                      | 0.71 |                              |  |
| 20                        | 9.57 | -0.54                      | 0.68 |                              |  |
| 25                        | 9.82 | -0.56                      | 0.67 |                              |  |

Table S1: Experimental pH values of the solution and thermodynamic stability limits of water decomposition at 25°C. Decomposition values have been calculated using the corresponding Nernst equations.

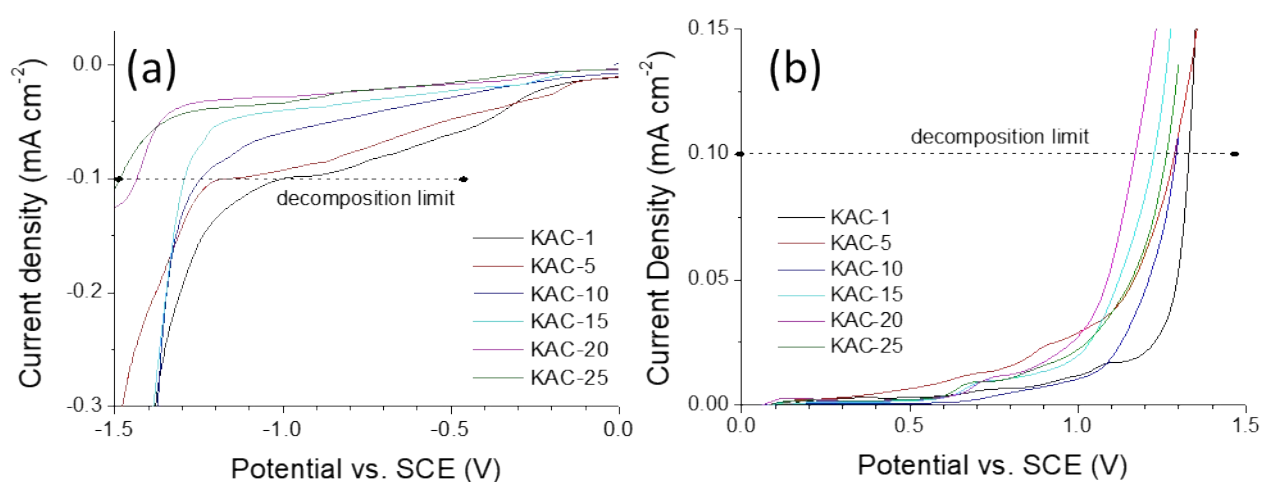

Figure S8. Cathodic and anodic LSV for the determination of the solutions decomposition limits.

| $\nu_{\max}$<br>cm <sup>-1</sup> | Relative<br>Intensity | Assignment                   |
|----------------------------------|-----------------------|------------------------------|
| 470                              | 2.7                   | $\rho\text{CO}_2$            |
| 622                              | 4.9                   | $\omega\text{CO}_2$          |
| 651                              | 14                    | $\delta\text{CO}_2$          |
| 924                              | 84                    | $\nu\text{CC}$               |
| 1018                             | 1.9                   | $\rho\text{CH}_3$            |
| 1345                             | 18                    | $\delta\text{CH}_3$          |
| 1412                             | 43                    | $\nu_s\text{CO}_2$           |
| 1576                             | 6.3                   | $\nu_{as}\text{CO}_2$        |
| 1667                             | 3.6                   | $\delta\text{H}_2\text{O}$   |
| 2672*                            | 2.1                   | n.a.                         |
| 2747*                            | 1.5                   | n.a.                         |
| 2849*                            | 8.4                   | n.a.                         |
| 2932                             | 100                   | $\nu_s\text{CH}_3$           |
| 2979                             | 29                    | $\nu_{as}\text{CH}_3$        |
| 3240 (b)                         | 15                    | $\nu_s\text{H}_2\text{O}$    |
| 3420 (b)                         | 20                    | $\nu_{as}\text{H}_2\text{O}$ |

Table S2: Experimental Raman frequencies of sample KAC-25, relative intensities are normalized with respect to the most intense peak at 2932 cm<sup>-1</sup>. Peaks assignment is taken from references (1) and (2). The abbreviations represent the following: b, broad; ρ, rocking; ω, wagging; δ, bending; ν, stretching; s, symmetric; as, asymmetric. Peaks marked with an asterisk miss of unambiguous and definite assignments. They have been already observed in previous works<sup>1</sup> and are likely due to overtones and/or combination of vibrational modes.

| Parameters              | Exponential fit:     | Logistic model fit:             |
|-------------------------|----------------------|---------------------------------|
|                         | $a + b \exp(-kC)$    | $a + L/[1 + \exp(-k(C - C_0))]$ |
| $a$ (cm <sup>-1</sup> ) | 1415.5               | 31.9                            |
| $b$ (cm <sup>-1</sup> ) | 0.226                | n.a.                            |
| $k$ (Kg/mol)            | $8.58 \cdot 10^{-2}$ | 0.251                           |
| $L$ (cm <sup>-1</sup> ) | n.a.                 | 4.43                            |
| $C_0$ (mol/kg)          | n.a.                 | 13.0                            |

Table S3: Fitting results of the exponential and logistic functions used to fit respectively peak maximum position and FWHM of the ν<sub>s</sub>CO<sub>2</sub> Raman peak as a function of KAC molality. For the sake of simplicity we used the same parameter labels,  $a$  and  $k$ , in the two fitting models. Importantly, these values are not connected each other, i.e. the two starting values and the two growth rates are independents.

#### References

1. W. Rudolph W, Irmer G. Raman spectroscopic studies and DFT calculations on NaCH<sub>3</sub>CO<sub>2</sub> and NaCD<sub>3</sub>CO<sub>2</sub> solutions in water and heavy water. RSC Advances. 2015;5(28):21897–908.
2. Carey DM, Korenowski GM. Measurement of the Raman spectrum of liquid water. J Chem Phys. 1998 Feb 15;108(7):2669–75.
